# Supplementary material for: Effective enhancement of the electrochemical performance of layered cathode Li1.5Mn0.75Ni0.25O2.5via a novel facile molten salt method
Source: Royal Society of Chemistry journal article supplement (doi:10.1039/c5ra06419h), 2015-01-01
Supplement: c5ra06419h1.pdf [file c5ra06419h1.pdf]

## Supporting Information

### **Effective Enhancement of Electrochemical Performance for Layered Cathode $\text{Li}_{1.5}\text{Mn}_{0.75}\text{Ni}_{0.25}\text{O}_{2.5}$ via A Novel Facile Molten Salt Method**

Zhuo Zheng,<sup>a</sup> Wei-Bo Hua,<sup>a</sup> Shi-Xuan Liao,<sup>a</sup> Yan-Jun Zhong,<sup>a</sup> En-Hui Wang,<sup>a</sup> Bin-Bin Xu,<sup>b</sup>  
Hua-Kun Liu<sup>c</sup> and Ben-He Zhong\*<sup>a</sup>

<sup>a</sup> College of Chemical Engineering, Sichuan University, No.24 South Section 1, Yihuan Road,  
Chengdu, 610065, China.

<sup>b</sup> Department of Chemistry, College of Chemistry and Chemical Engineering, Xiamen University,  
Fujian 361005, China.

<sup>c</sup> Institute for Superconducting and Electronic Materials, Australian Institute for Innovative  
Materials, University of Wollongong, Innovation Campus, North Wollongong, NSW, Australia.

\*Corresponding author. Email: zhongbenhe@163.com

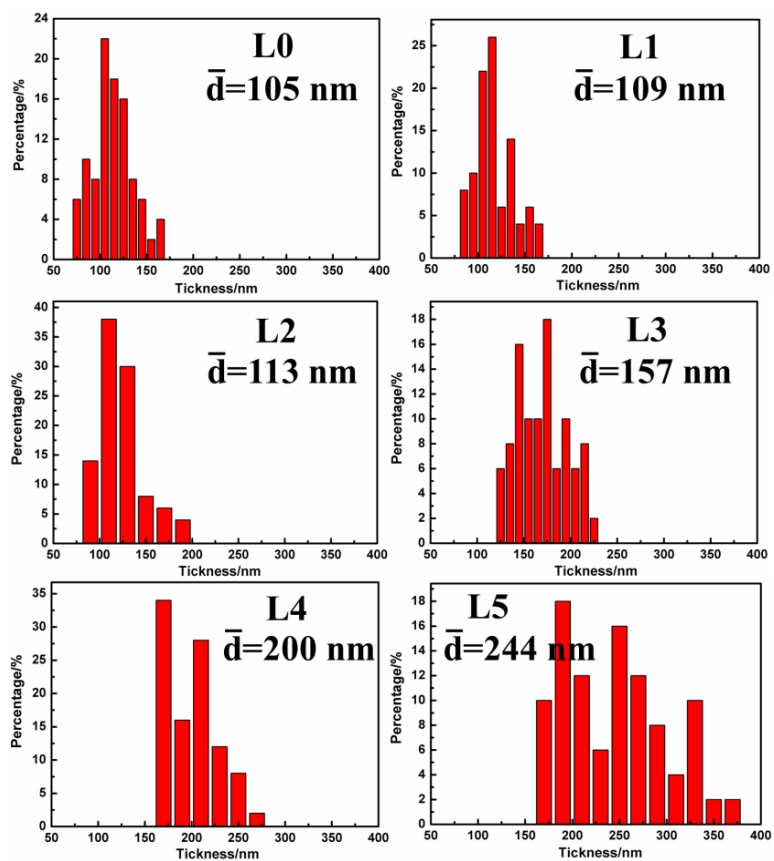

Fig. S1 Thickness distribution and the average thickness of L0 - L5 nanoplates

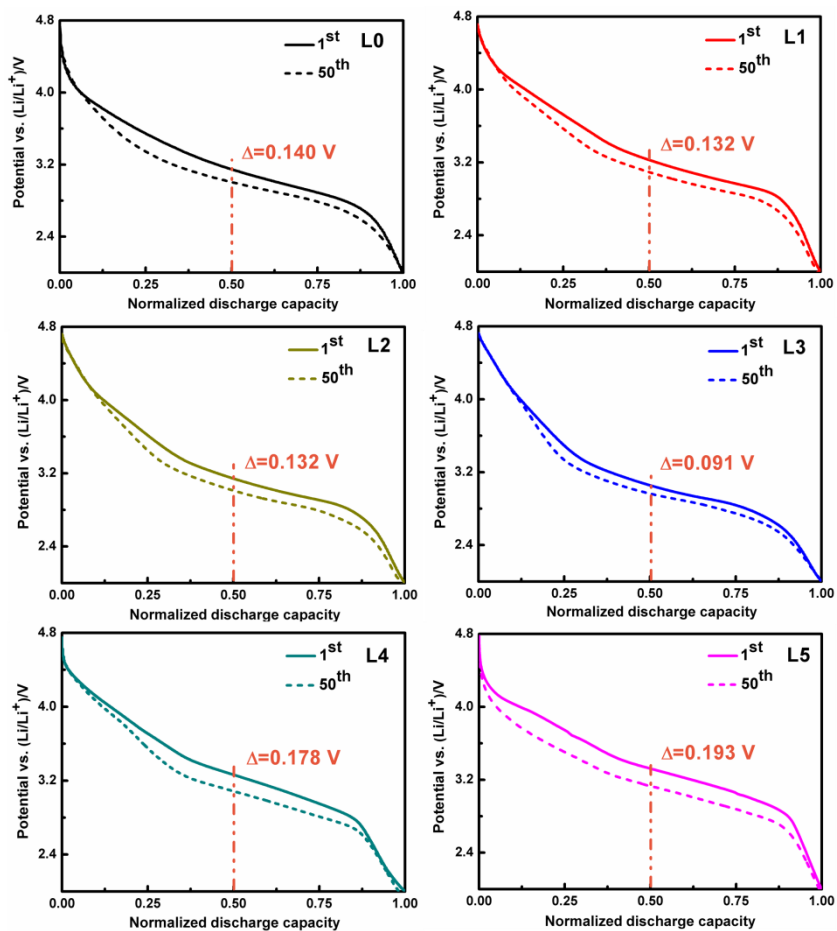

Fig. S2 Discharge profiles of 1<sup>st</sup> and 50<sup>th</sup> cycles of these samples at 0.2 C after normalization of capacity
